# Supplementary material for: Tenascin-C promotes epithelial-to-mesenchymal transition and the mTOR signaling pathway in nasopharyngeal carcinoma
Source: PubMed Central journal article supplement — Oncol Lett. 2021 May 29;22(1):570. doi: 10.3892/ol.2021.12831 (PMC8185706; doi:10.3892/ol.2021.12831), 2021-05-29

Figure S2. Weighted gene co-expression network analysis. (A) Sample dendrogram and trait heatmap based on gene expression data. (B and C) Analysis of scale-free fit index and the mean connectivity for various soft-thresholding powers. Scale-free topology was tested when  $\beta=7$ . (D) Clustering dendrograms of genes, with dissimilarity based on topological overlap, together with assigned module colors. (E) The heatmap depicts the topological overlap matrix amongst genes based on co-expression modules. A higher degree of module correlation is indicated by a darker background.

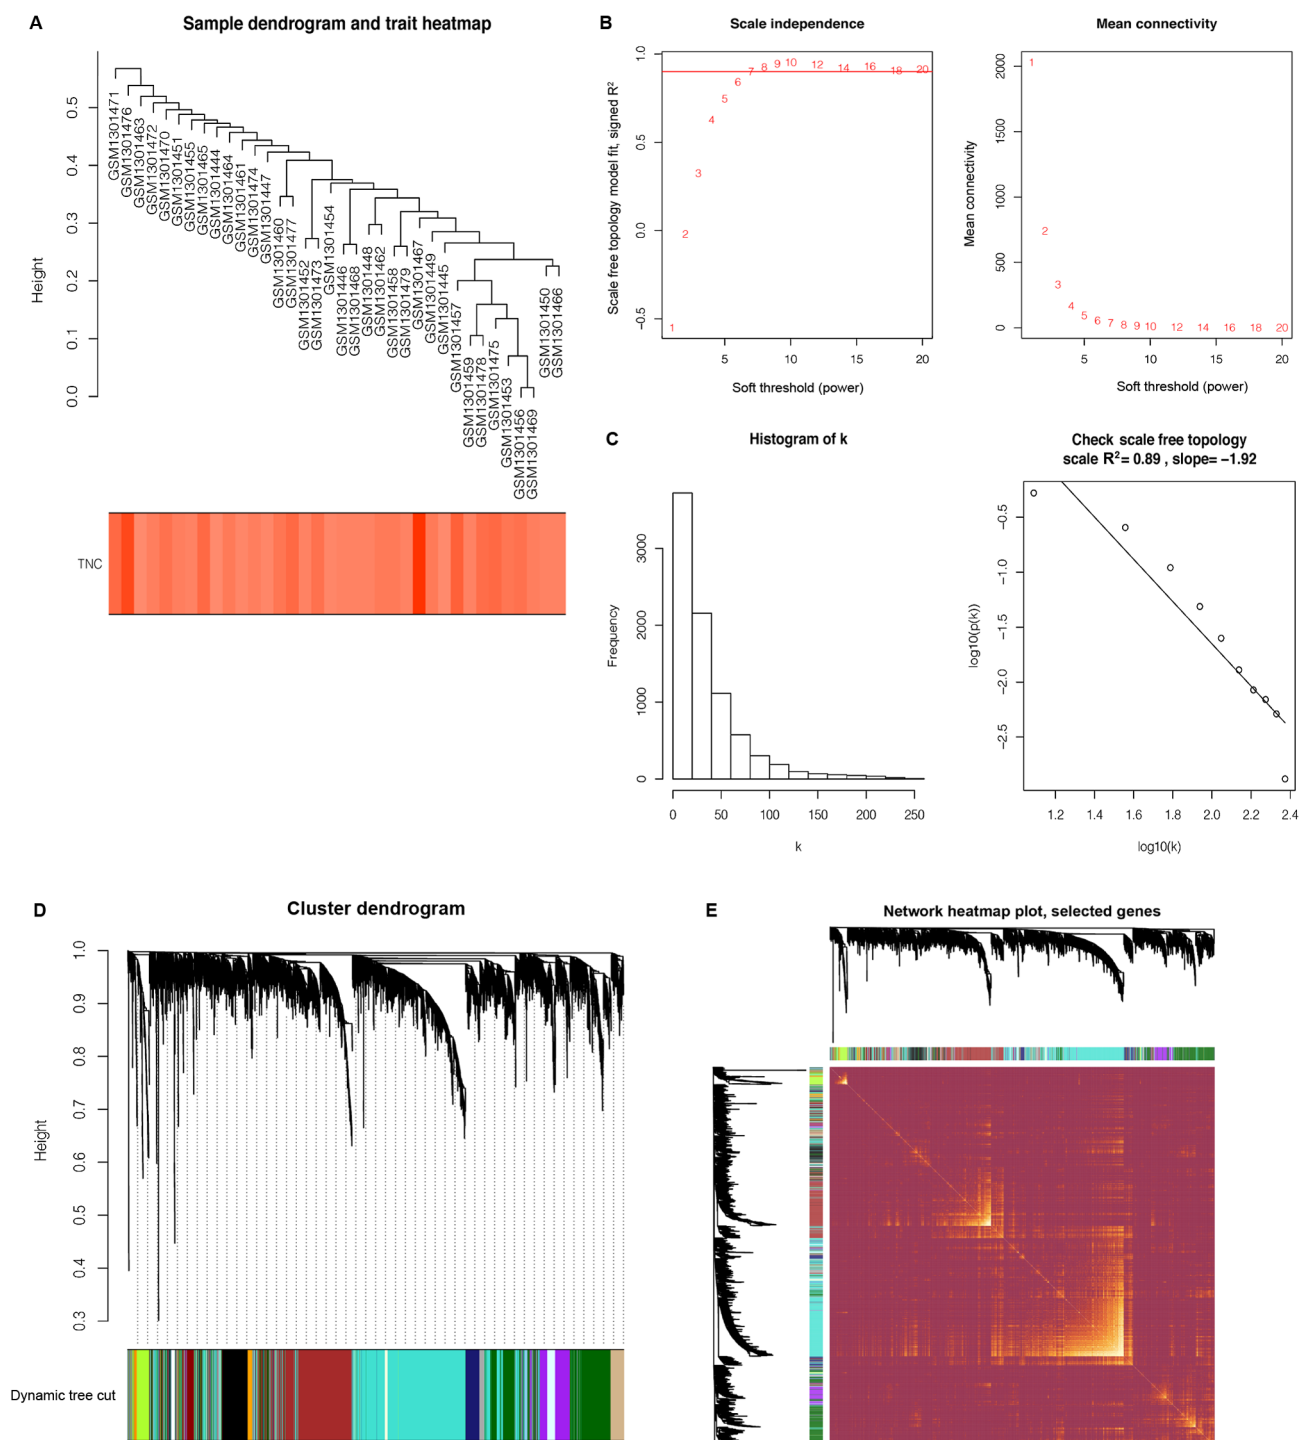

Figure S3. Weighted gene co-expression network analysis. (A) Clustering dendrograms of module eigengenes. Modules below the red line indicate that the correlation was  $>0.8$ , and these were merged. (B) Heatmap of the expression volume of the light cyan module and the histogram of the feature vector gene.

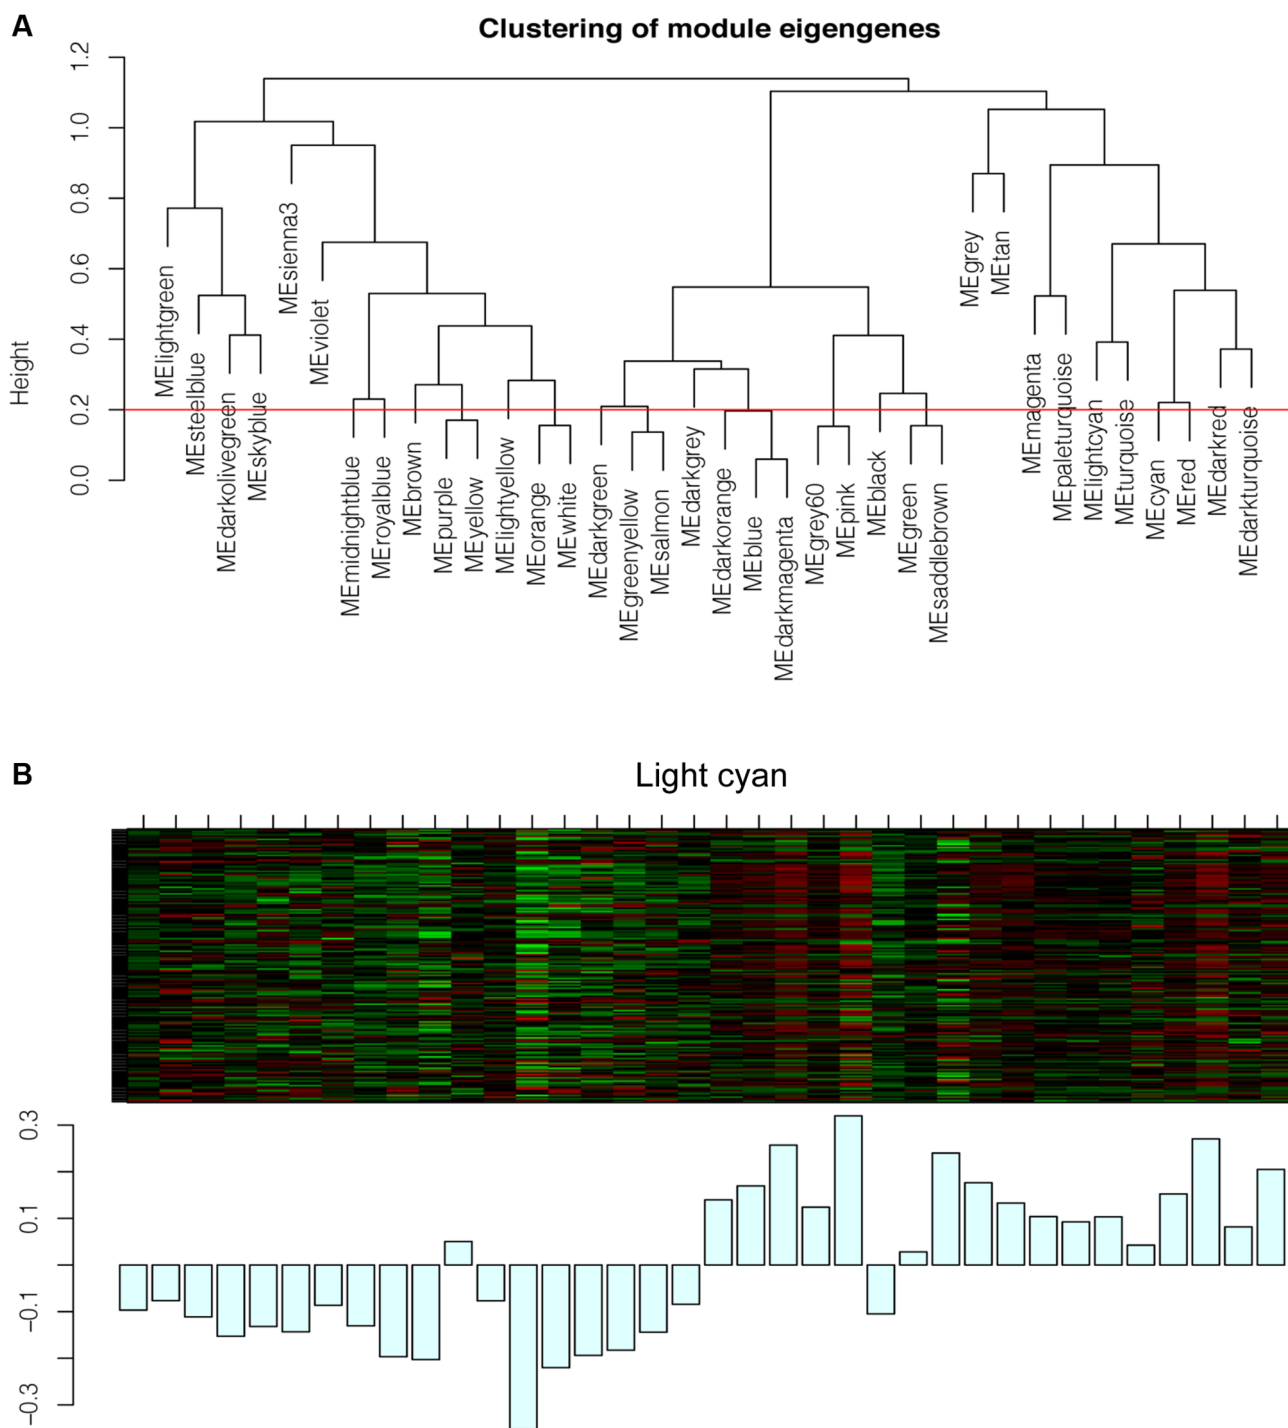

Figure S4. Weighted gene co-expression network analysis. Correlation between intermodular connectivity and the module membership.

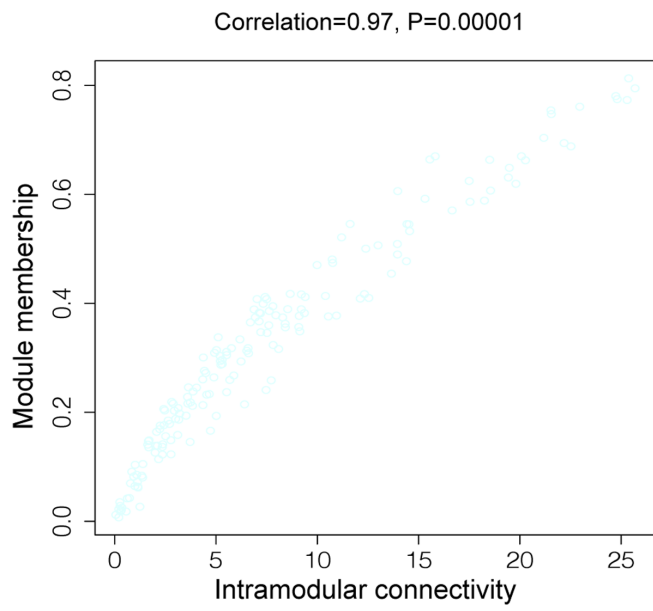

Supplement: Supplementary_Data.pdf [file Supplementary_Data.pdf]
